# Supplementary material for: SO2absorption in EmimCl–TEG deep eutectic solvents
Source: Royal Society of Chemistry journal article supplement (doi:10.1039/c8cp02250j), 2018-01-01
Supplement: c8cp02250j1.pdf [file c8cp02250j1.pdf]

## Supporting Information

# SO<sub>2</sub> Absorption in EmimCl-TEG Deep Eutectic Solvents

*Dezhong Yang*\*<sup>a</sup>, *Shaoze Zhang*<sup>b,c</sup>, *De-en Jiang*\*<sup>c</sup>, *Sheng Dai*\*<sup>d, e</sup>

<sup>a</sup> School of Science, China University of Geosciences, Haidian District, Beijing 100083, China

<sup>b</sup> Key Laboratory for Advanced Materials and School of Chemistry & Molecular Engineering, East China University of Science and Technology, Shanghai 200237, China.

<sup>c</sup> Department of Chemistry, University of California, Riverside, California 92521, United States

<sup>d</sup> Chemical Sciences Division, Oak Ridge National Laboratory, Oak Ridge, Tennessee 37831, United States

<sup>e</sup> Department of Chemistry, University of Tennessee, Knoxville, Tennessee 37996, United States.

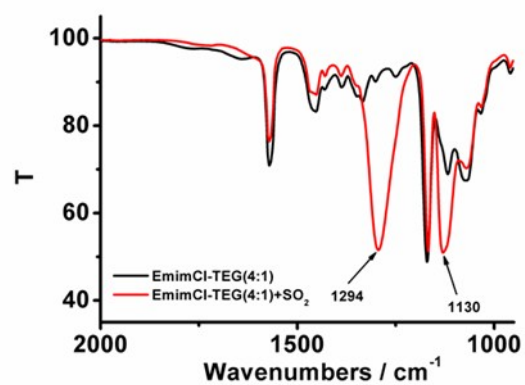

**Fig. S1** FTIR spectra of EmimCl-TEG(4:1) before and after SO<sub>2</sub> absorption.

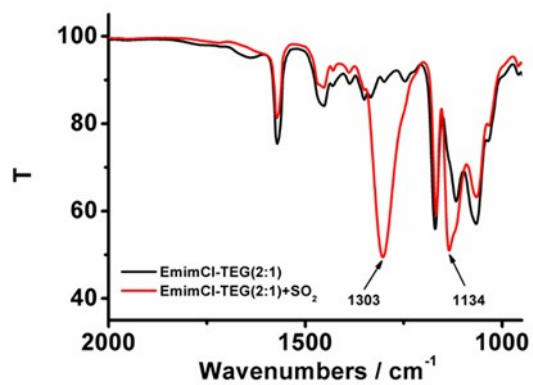

**Fig. S2** FTIR spectra of EmimCl-TEG(2:1) before and after SO<sub>2</sub> absorption.

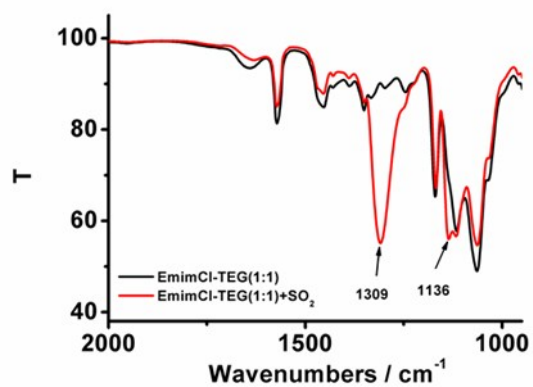

**Fig. S3** FTIR spectra of EmimCl-TEG(1:1) before and after SO<sub>2</sub> absorption.

**Table S1** The FTIR wavenumbers of EmimCl, TEG and EmimCl-TEG DESs

|                 | O-H  | C <sub>4,5</sub> -H | C <sub>2</sub> -H | C-O-C | C-OH |
|-----------------|------|---------------------|-------------------|-------|------|
| EmimCl          | —    | 3139                | 3038              | —     | —    |
| EmimCl-TEG(6:1) | 3254 | 3142                | 3049              | 1119  | 1080 |
| EmimCl-TEG(4:1) | 3264 | 3144                | 3058              | 1118  | 1069 |
| EmimCl-TEG(2:1) | 3282 | 3146                | 3070              | 1117  | 1066 |
| EmimCl-TEG(1:1) | 3321 | 3151                | 3094              | 1116  | 1064 |
| TEG             | 3395 | —                   | —                 | 1116  | 1059 |
